# Supplementary material
Source: MDPI journal article supplement (https://www.mdpi.com/2311-5637/5/4/94)
Supplement: s1 [file s1]

# Supplementary Materials: Influence of Native *Saccharomyces cerevisiae* Strains from D.O. “Vinos de Madrid” in the Volatile Profile of White Wines

Margarita García, Braulio Esteve-Zarzoso, Julia Crespo, Juan Mariano Cabellos and Teresa Arroyo

**Table S2.** Odour activity value proportion (% OAV) of each aromatic descriptor in wines elaborated with the *Saccharomyces cerevisiae* yeast strains. Values are the mean of two % OAV ratios.

| Strains (Cellar) | Solvent | Aromatic Series |            |        |        |                 |       |
|------------------|---------|-----------------|------------|--------|--------|-----------------|-------|
|                  |         | Sweet           | Herbaceous | Floral | Fruity | Microbiological | Fatty |
| G1(A)            | 0.77    | 42.36           | 0.09       | 1.46   | 44.08  | 0.01            | 11.24 |
| G2(A)            | 0.74    | 42.80           | 0.07       | 1.13   | 44.57  | 0.01            | 10.68 |
| G3(A)            | 1.69    | 33.51           | 0.44       | 2.00   | 40.37  | 0.01            | 21.98 |
| G4(A)            | 0.95    | 37.54           | 0.15       | 1.61   | 41.63  | 0.02            | 18.11 |
| G5(A)            | 0.81    | 36.72           | 0.19       | 2.05   | 41.51  | 0.02            | 18.70 |
| G6(A)            | 0.76    | 39.84           | 0.20       | 1.33   | 43.38  | 0.01            | 14.47 |
| G7(A)            | 0.78    | 34.41           | 0.10       | 1.35   | 45.73  | 0.01            | 16.62 |
| G8(A)            | 0.90    | 39.34           | 0.24       | 1.86   | 43.28  | 0.01            | 14.36 |
| G9(A)            | 1.46    | 34.62           | 0.27       | 2.66   | 38.30  | 0.02            | 22.67 |
| G10(D)           | 0.98    | 37.29           | 0.26       | 2.05   | 40.13  | 0.02            | 19.28 |
| G11(E)           | 0.77    | 36.10           | 0.24       | 1.61   | 43.65  | 0.01            | 17.62 |
| G12(A)           | 1.87    | 40.26           | 0.32       | 1.30   | 42.67  | 0.08            | 13.49 |
| G13(A)           | 0.90    | 35.89           | 0.22       | 2.68   | 41.13  | 0.02            | 19.15 |
| G14(F)           | 1.48    | 38.43           | 0.30       | 1.73   | 43.26  | 0.01            | 14.80 |
| G15(A)           | 0.95    | 36.03           | 0.19       | 2.17   | 41.26  | 0.02            | 19.39 |
| G16(A)           | 0.82    | 40.12           | 0.16       | 1.04   | 43.17  | 0.02            | 14.67 |
| G17(A)           | 0.75    | 38.34           | 0.21       | 1.99   | 41.93  | 0.02            | 16.77 |
| G18(A)           | 0.74    | 34.99           | 0.25       | 2.01   | 38.77  | 0.01            | 23.23 |
| G19(A)           | 1.79    | 31.69           | 0.85       | 2.55   | 37.43  | 0.01            | 25.69 |
| G20(A)           | 0.94    | 37.94           | 0.29       | 1.67   | 41.74  | 0.02            | 17.40 |
| G21(A)           | 0.58    | 39.73           | 0.12       | 1.51   | 43.95  | 0.01            | 14.09 |
| G22(A)           | 0.80    | 36.91           | 0.11       | 1.47   | 44.53  | 0.02            | 16.16 |
| G113(B)          | 1.31    | 38.76           | 0.07       | 1.12   | 43.60  | 0.07            | 15.06 |
| G114(C)          | 1.40    | 34.98           | 0.15       | 1.45   | 40.72  | 0.07            | 21.21 |
| G144(A)          | 1.00    | 41.98           | 0.09       | 1.44   | 44.76  | 0.02            | 10.71 |
| G145(A)          | 0.77    | 34.65           | 0.15       | 0.97   | 38.56  | 0.02            | 24.89 |
| G146(A)          | 1.14    | 36.79           | 0.19       | 1.56   | 42.94  | 0.02            | 17.35 |
| G147(E)          | 0.79    | 36.27           | 0.24       | 1.48   | 43.73  | 0.00            | 17.49 |
| G198(E)          | 0.85    | 35.20           | 0.26       | 1.34   | 41.94  | 0.01            | 20.39 |
| G227(E)          | 0.99    | 34.68           | 0.19       | 1.27   | 44.10  | 0.01            | 18.77 |
| G354(E)          | 0.78    | 35.07           | 0.19       | 0.83   | 43.73  | 0.01            | 19.39 |
| G361(E)          | 0.48    | 40.05           | 0.30       | 0.98   | 45.10  | 0.00            | 13.09 |
| G379(D)          | 0.92    | 32.30           | 0.23       | 1.58   | 35.49  | 0.01            | 29.48 |
| G393(E)          | 0.90    | 39.45           | 0.17       | 1.10   | 43.70  | 0.06            | 14.63 |
| G406(D)          | 0.80    | 38.47           | 0.41       | 1.64   | 42.27  | 0.01            | 16.39 |
| G448(D)          | 0.83    | 35.08           | 0.28       | 1.05   | 38.96  | 0.01            | 23.79 |
| G449(E)          | 0.82    | 38.30           | 0.33       | 1.62   | 44.11  | 0.00            | 14.80 |
| G450(E)          | 0.89    | 36.07           | 0.27       | 2.02   | 44.67  | 0.01            | 16.07 |
| G451(E)          | 0.70    | 41.98           | 0.04       | 1.61   | 43.73  | 0.01            | 11.93 |
| G452(E)          | 1.09    | 33.85           | 0.30       | 1.58   | 39.56  | 0.01            | 23.61 |
| G453(E)          | 1.07    | 35.64           | 0.32       | 1.61   | 41.25  | 0.01            | 20.09 |
| G454(E)          | 0.77    | 34.80           | 0.27       | 1.22   | 42.05  | 0.01            | 20.86 |
| G456(E)          | 1.07    | 36.07           | 0.42       | 1.82   | 40.69  | 0.01            | 19.92 |
| G457(E)          | 0.63    | 41.01           | 0.09       | 1.66   | 43.50  | 0.01            | 13.10 |
| G458(E)          | 0.97    | 32.67           | 0.38       | 1.59   | 38.56  | 0.01            | 25.83 |
| G460(E)          | 0.95    | 36.66           | 0.39       | 1.58   | 40.48  | 0.01            | 19.93 |
| G461(E)          | 1.29    | 33.88           | 0.28       | 1.64   | 39.15  | 0.01            | 23.75 |

Table S2 (Continued)

| Strains (Cellar) | Solvent | Aromatic Series |            |        |        |                 | Fatty |
|------------------|---------|-----------------|------------|--------|--------|-----------------|-------|
|                  |         | Sweet           | Herbaceous | Floral | Fruity | Microbiological |       |
| G462(E)          | 3.04    | 25.49           | 0.45       | 2.34   | 29.60  | 0.01            | 39.07 |
| G463(E)          | 0.80    | 36.95           | 0.28       | 1.57   | 42.62  | 0.01            | 17.78 |
| G464(E)          | 0.75    | 35.65           | 0.11       | 1.48   | 38.01  | 0.01            | 23.99 |
| G465(E)          | 1.59    | 35.42           | 0.38       | 1.98   | 40.97  | 0.07            | 19.60 |
| G467(E)          | 0.82    | 36.32           | 0.32       | 1.73   | 40.44  | 0.01            | 20.36 |
| G468(E)          | 1.28    | 34.35           | 0.30       | 1.36   | 38.97  | 0.01            | 23.73 |
| G469(E)          | 1.20    | 34.92           | 0.53       | 1.75   | 39.22  | 0.01            | 22.38 |
| G470(E)          | 1.46    | 35.48           | 0.28       | 1.95   | 40.83  | 0.01            | 19.99 |
| G471(E)          | 1.41    | 34.00           | 0.26       | 1.56   | 41.81  | 0.01            | 20.95 |
| G472(E)          | 1.30    | 35.54           | 0.24       | 1.84   | 42.37  | 0.01            | 18.70 |
| G473(E)          | 1.43    | 35.33           | 0.25       | 1.72   | 42.17  | 0.01            | 19.09 |
| G474(E)          | 0.75    | 36.11           | 0.33       | 1.57   | 42.13  | 0.01            | 19.10 |
| G475(E)          | 2.79    | 25.36           | 0.55       | 2.71   | 28.34  | 0.01            | 40.23 |
| G476(E)          | 0.83    | 36.27           | 0.20       | 1.60   | 43.51  | 0.01            | 17.58 |
| G487(E)          | 0.88    | 38.42           | 0.21       | 1.95   | 45.40  | 0.01            | 13.13 |
| G488(E)          | 0.83    | 36.13           | 0.23       | 1.72   | 44.88  | 0.00            | 16.20 |
| G489(E)          | 0.88    | 35.41           | 0.23       | 1.80   | 41.95  | 0.01            | 19.72 |
| G490(E)          | 0.54    | 42.31           | 0.06       | 1.71   | 44.81  | 0.01            | 10.56 |
| G491(E)          | 0.73    | 42.06           | 0.09       | 1.71   | 44.81  | 0.01            | 10.59 |
| G492(E)          | 1.08    | 34.17           | 0.32       | 1.63   | 42.77  | 0.01            | 20.02 |
| G493(E)          | 1.03    | 36.06           | 0.25       | 1.54   | 41.35  | 0.02            | 19.77 |
| G494(E)          | 1.14    | 34.29           | 0.37       | 1.43   | 38.01  | 0.02            | 24.74 |
| G495(E)          | 1.37    | 33.55           | 0.31       | 1.91   | 39.26  | 0.02            | 23.58 |
| G496(E)          | 1.09    | 35.30           | 0.27       | 1.82   | 40.95  | 0.02            | 20.54 |
| G497(E)          | 1.15    | 34.78           | 0.38       | 1.71   | 40.38  | 0.02            | 21.58 |
| G499(E)          | 1.06    | 34.61           | 0.23       | 2.30   | 40.10  | 0.02            | 21.68 |
| G500(E)          | 1.03    | 31.00           | 0.16       | 1.65   | 38.46  | 0.01            | 27.67 |
| G501(E)          | 1.41    | 34.74           | 0.38       | 1.73   | 40.57  | 0.02            | 21.14 |
| G502(E)          | 2.07    | 31.40           | 0.22       | 1.55   | 35.66  | 0.02            | 29.08 |
| G503(F)          | 1.38    | 38.95           | 0.28       | 2.30   | 44.17  | 0.00            | 12.92 |
| G504(F)          | 1.49    | 39.23           | 0.28       | 2.31   | 44.72  | 0.01            | 11.95 |
| G505(F)          | 1.18    | 34.35           | 0.09       | 1.54   | 40.26  | 0.01            | 22.57 |
| G506(F)          | 1.37    | 39.53           | 0.24       | 1.49   | 44.59  | 0.00            | 12.78 |
| G507(F)          | 0.88    | 32.44           | 0.37       | 0.78   | 36.29  | 0.01            | 29.23 |
| G508(F)          | 1.81    | 35.44           | 0.34       | 1.45   | 40.82  | 0.01            | 20.13 |
| G509(F)          | 1.24    | 35.09           | 0.39       | 2.02   | 38.79  | 0.01            | 22.46 |
| G510(F)          | 1.13    | 34.41           | 0.37       | 2.23   | 39.18  | 0.01            | 22.67 |
| G511(F)          | 1.30    | 33.82           | 0.48       | 2.36   | 37.91  | 0.01            | 24.12 |
| G512(F)          | 1.33    | 35.39           | 0.38       | 2.14   | 39.61  | 0.01            | 21.14 |
| G513(F)          | 1.08    | 34.91           | 0.29       | 3.07   | 39.62  | 0.01            | 21.03 |
| G514(F)          | 1.09    | 35.57           | 0.31       | 2.79   | 40.96  | 0.01            | 19.28 |
| G515(F)          | 1.11    | 34.68           | 0.41       | 2.54   | 39.65  | 0.01            | 21.60 |
| G516(F)          | 1.02    | 35.31           | 0.39       | 1.77   | 39.26  | 0.01            | 22.25 |
| G517(F)          | 1.00    | 34.77           | 0.41       | 2.43   | 38.57  | 0.01            | 22.81 |
| G518(F)          | 0.95    | 35.58           | 0.45       | 2.53   | 40.20  | 0.01            | 20.28 |
| G519(F)          | 0.88    | 40.10           | 0.13       | 2.03   | 44.96  | 0.01            | 11.88 |
| G520(F)          | 0.81    | 38.34           | 0.10       | 1.92   | 43.11  | 0.01            | 15.70 |
| G521(F)          | 0.90    | 39.48           | 0.15       | 2.26   | 43.78  | 0.01            | 13.41 |
| G522(F)          | 0.89    | 38.74           | 0.09       | 2.17   | 44.42  | 0.01            | 13.67 |
| G523(E)          | 1.32    | 35.23           | 0.09       | 0.73   | 36.36  | 0.02            | 26.25 |
| G524(E)          | 0.99    | 33.82           | 0.14       | 1.39   | 38.66  | 0.02            | 24.98 |
| G528(F)          | 0.82    | 35.98           | 0.27       | 2.63   | 39.21  | 0.01            | 21.08 |
| G529(F)          | 0.80    | 39.51           | 0.28       | 2.12   | 42.57  | 0.01            | 14.71 |
| G531(F)          | 0.93    | 35.96           | 0.21       | 1.39   | 40.23  | 0.01            | 21.26 |
