# Supplementary material
Source: MDPI journal article supplement (https://www.mdpi.com/2311-5637/5/4/94)
Supplement: s1 [file s1]

# Supplementary Materials: Influence of Native *Saccharomyces cerevisiae* Strains from D.O. “Vinos de Madrid” in the Volatile Profile of White Wines

Margarita García, Braulio Esteve-Zarzoso, Julia Crespo, Juan Mariano Cabellos and Teresa Arroyo

**Table S1.** Odour activity value (OAV) for the aroma compounds studied in Malvar wines.

Values are the mean of two OAV ratios. OAV  $\geq 1$  values are indicated in bold.

| Compounds                    | Strains(Cellar) |               |               |               |               |               |               |               |               |               |               |               |               |
|------------------------------|-----------------|---------------|---------------|---------------|---------------|---------------|---------------|---------------|---------------|---------------|---------------|---------------|---------------|
|                              | G1(A)           | G2(A)         | G3(A)         | G4(A)         | G5(A)         | G6(A)         | G7(A)         | G8(A)         | G9(A)         | G10(D)        | G11(E)        | G12(A)        | G13(A)        |
| 1-Propanol                   | 0.38            | 0.79          | 0.20          | 0.21          | 0.21          | 0.20          | 0.23          | 0.19          | 0.28          | 0.23          | 0.38          | 0.29          | 0.20          |
| 1-Butanol                    | <0.1            | <0.1          | <0.1          | <0.1          | <0.1          | <0.1          | <0.1          | <0.1          | <0.1          | <0.1          | <0.1          | <0.1          | <0.1          |
| Isobutanol                   | 0.95            | 0.70          | 0.88          | 0.78          | 0.84          | 0.91          | 0.40          | 0.66          | 0.83          | 0.65          | <b>1.12</b>   | <b>1.09</b>   | 0.61          |
| Isoamyl alcohol              | <b>6.12</b>     | <b>6.12</b>   | <b>8.05</b>   | <b>7.13</b>   | <b>5.09</b>   | <b>5.66</b>   | <b>4.30</b>   | <b>5.31</b>   | <b>9.38</b>   | <b>6.89</b>   | <b>8.43</b>   | <b>9.62</b>   | <b>5.73</b>   |
| (Z)-3-Hexen-1-ol             | 0.25            | 0.24          | 0.22          | 0.27          | 0.24          | 0.25          | 0.24          | 0.24          | 0.33          | 0.21          | 0.23          | 0.21          | 0.24          |
| 1-Hexanol                    | <0.1            | <0.1          | <0.1          | <0.1          | <0.1          | <0.1          | <0.1          | <0.1          | <0.1          | <0.1          | <0.1          | <0.1          | <0.1          |
| Metionol                     | 0.54            | 0.37          | <b>2.13</b>   | 0.90          | <b>1.14</b>   | <b>1.48</b>   | 0.31          | <b>1.36</b>   | <b>1.55</b>   | <b>1.78</b>   | <b>2.84</b>   | <b>1.60</b>   | <b>1.32</b>   |
| Benzyl alcohol               | <0.1            | <0.1          | <0.1          | <0.1          | <0.1          | <0.1          | <0.1          | <0.1          | <0.1          | <0.1          | <0.1          | <0.1          | <0.1          |
| $\beta$ -Phenylethyl alcohol | <b>6.12</b>     | <b>6.31</b>   | <b>6.37</b>   | <b>4.68</b>   | <b>4.10</b>   | <b>4.21</b>   | <b>2.14</b>   | <b>4.22</b>   | <b>5.55</b>   | <b>4.65</b>   | <b>7.17</b>   | <b>7.22</b>   | <b>5.66</b>   |
| Ethyl butyrate               | <b>11.20</b>    | <b>11.12</b>  | <b>13.04</b>  | <b>13.90</b>  | <b>11.18</b>  | <b>14.22</b>  | <b>12.60</b>  | <b>9.20</b>   | <b>12.69</b>  | <b>11.16</b>  | <b>26.68</b>  | <b>5.09</b>   | <b>14.82</b>  |
| Ethyl isovalerate            | <b>148.85</b>   | <b>185.28</b> | <b>96.41</b>  | <b>169.74</b> | <b>156.93</b> | <b>193.61</b> | <b>123.33</b> | <b>149.08</b> | <b>86.92</b>  | <b>126.62</b> | <b>210.89</b> | <b>196.10</b> | <b>122.86</b> |
| Isoamyl acetate              | <b>242.70</b>   | <b>234.51</b> | <b>63.77</b>  | <b>132.58</b> | <b>105.13</b> | <b>144.03</b> | <b>83.72</b>  | <b>104.79</b> | <b>142.27</b> | <b>153.65</b> | <b>219.39</b> | <b>27.98</b>  | <b>114.42</b> |
| Ethyl hexanoate              | <b>21.98</b>    | <b>23.49</b>  | <b>42.79</b>  | <b>39.25</b>  | <b>40.02</b>  | <b>35.31</b>  | <b>66.72</b>  | <b>30.61</b>  | <b>31.53</b>  | <b>26.83</b>  | <b>104.24</b> | <b>20.80</b>  | <b>43.12</b>  |
| Ethyl-3-hydroxybutyrate      | <0.1            | <0.1          | <0.1          | <0.1          | <0.1          | <0.1          | <0.1          | <0.1          | <0.1          | <0.1          | <0.1          | <0.1          | <0.1          |
| Hexyl acetate                | <0.1            | <0.1          | <0.1          | 0.12          | 0.12          | 0.10          | 0.12          | 0.10          | 0.10          | <0.1          | 0.11          | <0.1          | 0.10          |
| 2-Phenylethyl acetate        | <b>7.52</b>     | <b>6.25</b>   | <b>3.34</b>   | <b>7.84</b>   | <b>10.13</b>  | <b>6.86</b>   | <b>4.73</b>   | <b>7.38</b>   | <b>12.26</b>  | <b>10.59</b>  | <b>10.11</b>  | 0.31          | <b>12.12</b>  |
| Diethyl succinate            | <0.1            | <0.1          | <0.1          | <0.1          | <0.1          | <0.1          | <0.1          | <0.1          | <0.1          | <0.1          | <0.1          | <0.1          | <0.1          |
| Ethyl octanoate              | 0.32            | 0.22          | <b>1.07</b>   | <b>1.28</b>   | <b>1.29</b>   | 0.87          | <b>1.65</b>   | <b>1.07</b>   | <b>1.33</b>   | <b>1.12</b>   | <b>3.64</b>   | 0.13          | <b>1.60</b>   |
| Ethyl lactate                | <0.1            | <0.1          | <0.1          | 0.13          | 0.14          | 0.12          | <0.1          | 0.10          | 0.15          | 0.13          | <0.10         | 0.50          | 0.11          |
| Isobutyric acid              | <b>58.82</b>    | <b>56.47</b>  | <b>48.40</b>  | <b>86.36</b>  | <b>82.26</b>  | <b>76.35</b>  | <b>36.40</b>  | <b>51.48</b>  | <b>71.36</b>  | <b>86.01</b>  | <b>103.70</b> | <b>50.43</b>  | <b>72.10</b>  |
| Butyric acid                 | 0.97            | <b>1.02</b>   | 0.92          | 0.95          | 0.92          | 0.92          | 0.84          | 0.85          | 0.93          | 0.94          | <b>1.26</b>   | 0.68          | <b>1.03</b>   |
| Isovaleric acid              | <b>33.22</b>    | <b>38.35</b>  | <b>49.41</b>  | <b>35.54</b>  | <b>26.31</b>  | <b>26.81</b>  | <b>15.14</b>  | <b>17.80</b>  | <b>57.33</b>  | <b>34.76</b>  | <b>79.74</b>  | <b>19.52</b>  | <b>31.14</b>  |
| Hexanoic acid                | <b>6.45</b>     | <b>5.29</b>   | <b>6.39</b>   | <b>6.91</b>   | <b>7.74</b>   | <b>5.26</b>   | <b>12.17</b>  | <b>5.74</b>   | <b>5.39</b>   | <b>5.95</b>   | <b>16.28</b>  | <b>1.67</b>   | <b>8.84</b>   |
| Octanoic acid                | <b>2.82</b>     | <b>1.84</b>   | <b>9.91</b>   | <b>13.22</b>  | <b>13.66</b>  | <b>10.72</b>  | <b>22.34</b>  | <b>11.31</b>  | <b>12.73</b>  | <b>11.79</b>  | <b>20.30</b>  | <b>1.84</b>   | <b>15.46</b>  |
| Decanoic acid                | 0.33            | 0.50          | 0.86          | <b>1.62</b>   | <b>1.44</b>   | <b>1.19</b>   | <b>2.98</b>   | <b>1.30</b>   | <b>1.61</b>   | <b>1.50</b>   | <b>1.57</b>   | 0.32          | <b>1.60</b>   |
| Diacetyl                     | <b>5.97</b>     | <b>5.83</b>   | <b>2.67</b>   | <b>10.96</b>  | <b>9.74</b>   | <b>8.46</b>   | <b>15.04</b>  | <b>9.55</b>   | <b>13.90</b>  | <b>12.80</b>  | <b>5.57</b>   | <b>4.81</b>   | <b>8.42</b>   |
| Furfural                     | <0.1            | <0.1          | <0.1          | <0.1          | <0.1          | <0.1          | <0.1          | <0.1          | <0.1          | <0.1          | <0.1          | <0.1          | <0.1          |
| Benzaldehyde                 | <0.1            | <0.1          | <0.1          | <0.1          | <0.1          | <0.1          | <0.1          | <0.1          | <0.1          | <0.1          | <0.1          | <0.1          | <0.1          |
| Phenylacetaldehyde           | 0.11            | 0.25          | <0.1          | <0.1          | <0.1          | <0.1          | <0.1          | <0.1          | <0.1          | <0.1          | <0.1          | <0.1          | <0.1          |
| Acetoin                      | <0.1            | <0.1          | <0.1          | <0.1          | <0.1          | <0.1          | <0.1          | <0.1          | <0.1          | <0.1          | <0.1          | <0.1          | <0.1          |
| $\gamma$ -Butyrolactone      | 0.26            | 0.43          | 0.13          | 0.25          | 0.35          | 0.20          | 0.25          | 0.24          | 0.51          | 0.26          | 0.22          | 0.16          | 0.29          |
|                              | G14(F)          | G15(A)        | G16(A)        | G17(A)        | G18(A)        | G19(A)        | G20(A)        | G21(A)        | G22(A)        | G113(B)       | G114(C)       | G144(A)       | G145(A)       |
| 1-Propanol                   | 0.21            | 0.19          | 0.21          | 0.20          | 0.18          | 0.15          | 0.20          | 0.21          | 0.21          | 0.89          | 0.99          | 0.51          | 0.13          |
| 1-Butanol                    | <0.1            | <0.1          | <0.1          | <0.1          | <0.1          | <0.1          | <0.1          | <0.1          | <0.1          | <0.1          | <0.1          | <0.1          | <0.1          |
| Isobutanol                   | 0.59            | 0.52          | 0.55          | 0.70          | <b>1.19</b>   | 0.82          | 0.62          | 0.52          | 0.40          | 0.94          | 0.97          | 0.79          | 0.58          |
| Isoamyl alcohol              | <b>5.99</b>     | <b>4.65</b>   | <b>3.83</b>   | <b>4.43</b>   | <b>6.74</b>   | <b>9.20</b>   | <b>6.18</b>   | <b>5.33</b>   | <b>3.92</b>   | <b>9.26</b>   | <b>6.86</b>   | <b>7.69</b>   | <b>2.95</b>   |
| (Z)-3-Hexen-1-ol             | 0.18            | 0.18          | 0.20          | 0.24          | 0.28          | 0.21          | 0.26          | 0.23          | 0.21          | 0.28          | 0.27          | 0.27          | 0.14          |
| 1-Hexanol                    | <0.1            | <0.1          | <0.1          | <0.1          | <0.1          | <0.1          | <0.1          | <0.1          | <0.1          | <0.1          | <0.1          | 0.10          | <0.1          |
| Metionol                     | <b>1.15</b>     | 0.84          | 0.60          | <b>1.21</b>   | <b>2.40</b>   | <b>4.55</b>   | <b>1.84</b>   | 0.94          | 0.36          | 0.25          | 0.62          | 0.41          | 0.50          |
| Benzyl alcohol               | <0.1            | <0.1          | <0.1          | <0.1          | <0.1          | <0.1          | <0.1          | <0.1          | <0.1          | <0.1          | <0.1          | <0.1          | <0.1          |
| $\beta$ -Phenylethyl alcohol | <b>2.84</b>     | <b>4.06</b>   | <b>2.44</b>   | <b>4.52</b>   | <b>6.12</b>   | <b>9.78</b>   | <b>4.81</b>   | <b>5.00</b>   | <b>2.27</b>   | <b>6.62</b>   | <b>5.96</b>   | <b>5.28</b>   | <b>1.79</b>   |
| Ethyl butyrate               | <b>13.50</b>    | <b>10.57</b>  | <b>9.97</b>   | <b>9.91</b>   | <b>15.60</b>  | <b>10.65</b>  | <b>12.78</b>  | <b>15.27</b>  | <b>12.05</b>  | <b>18.01</b>  | <b>13.32</b>  | <b>13.12</b>  | <b>17.03</b>  |
| Ethyl isovalerate            | <b>47.52</b>    | <b>114.69</b> | <b>135.36</b> | <b>183.17</b> | <b>188.10</b> | <b>92.29</b>  | <b>159.25</b> | <b>271.82</b> | <b>118.73</b> | <b>258.86</b> | <b>170.47</b> | <b>184.45</b> | <b>95.95</b>  |
| Isoamyl acetate              | <b>111.72</b>   | <b>73.15</b>  | <b>75.58</b>  | <b>75.08</b>  | <b>171.41</b> | <b>66.52</b>  | <b>104.87</b> | <b>119.65</b> | <b>76.21</b>  | <b>44.10</b>  | <b>29.53</b>  | <b>173.67</b> | <b>47.75</b>  |
| Ethyl hexanoate              | <b>24.44</b>    | <b>33.19</b>  | <b>18.93</b>  | <b>29.56</b>  | <b>47.01</b>  | <b>41.86</b>  | <b>32.54</b>  | <b>48.37</b>  | <b>45.22</b>  | <b>46.51</b>  | <b>40.65</b>  | <b>29.54</b>  | <b>20.06</b>  |
| Ethyl-3-hydroxybutyrate      | <0.1            | <0.1          | <0.1          | <0.1          | <0.1          | <0.1          | <0.1          | <0.1          | <0.1          | <0.1          | <0.1          | <0.1          | <0.1          |
| Hexyl acetate                | <0.1            | <0.1          | <0.1          | <0.1          | 0.14          | <0.1          | 0.10          | 0.11          | 0.11          | <0.1          | <0.1          | <0.1          | <0.1          |
| 2-Phenylethyl acetate        | <b>3.99</b>     | <b>7.10</b>   | <b>2.96</b>   | <b>8.78</b>   | <b>13.99</b>  | <b>3.87</b>   | <b>6.81</b>   | <b>9.25</b>   | <b>4.91</b>   | <b>2.50</b>   | <b>2.81</b>   | <b>7.28</b>   | <b>1.51</b>   |
| Diethyl succinate            | <0.1            | <0.1          | <0.1          | <0.1          | <0.1          | <0.1          | <0.1          | <0.1          | <0.1          | <0.1          | <0.1          | <0.1          | <0.1          |
| Ethyl octanoate              | <b>1.15</b>     | <b>1.08</b>   | 0.38          | 0.86          | <b>1.84</b>   | 0.85          | 0.75          | <b>1.44</b>   | <b>1.20</b>   | 0.40          | 0.36          | 0.28          | <b>1.28</b>   |
| Ethyl lactate                | <0.1            | <0.1          | 0.13          | 0.12          | 0.13          | <0.1          | 0.12          | 0.10          | <0.1          | 0.46          | 0.37          | <0.1          | <0.1          |
| Isobutyric acid              | <b>31.09</b>    | <b>52.62</b>  | <b>43.45</b>  | <b>64.42</b>  | <b>165.46</b> | <b>70.87</b>  | <b>65.90</b>  | <b>72.94</b>  | <b>36.37</b>  | <b>50.77</b>  | <b>63.68</b>  | <b>46.67</b>  | <b>74.18</b>  |
| Butyric acid                 | 0.70            | 0.89          | 0.84          | 0.93          | 1.24          | 0.89          | 1.05          | 1.14          | 0.87          | 1.34          | 1.02          | 1.03          | 1.25          |
| Isovaleric acid              | <b>21.87</b>    | <b>26.96</b>  | <b>15.16</b>  | <b>26.29</b>  | <b>52.92</b>  | <b>54.36</b>  | <b>32.38</b>  | <b>31.22</b>  | <b>11.63</b>  | <b>52.23</b>  | <b>55.32</b>  | <b>30.49</b>  | <b>26.00</b>  |
| Hexanoic acid                | <b>4.27</b>     | <b>7.23</b>   | <b>4.74</b>   | <b>6.78</b>   | <b>8.40</b>   | <b>6.21</b>   | <b>7.08</b>   | <b>10.90</b>  | <b>10.48</b>  | <b>11.50</b>  | <b>6.14</b>   | <b>6.41</b>   | <b>5.23</b>   |
| Octanoic acid                | <b>5.97</b>     | <b>12.63</b>  | <b>8.78</b>   | <b>12.26</b>  | <b>15.64</b>  | <b>10.17</b>  | <b>14.13</b>  | <b>18.54</b>  | <b>19.74</b>  | <b>3.59</b>   | <b>2.34</b>   | <b>1.87</b>   | <b>7.96</b>   |
| Decanoic acid                | 0.39            | <b>1.36</b>   | <b>1.06</b>   | <b>1.24</b>   | <b>1.64</b>   | <b>1.14</b>   | <b>1.92</b>   | <b>1.58</b>   | <b>2.72</b>   | <b>1.63</b>   | <0.1          | 0.48          | 0.79          |
| Diacetyl                     | <b>3.78</b>     | <b>7.98</b>   | <b>7.83</b>   | <b>7.77</b>   | <b>9.21</b>   | <b>2.41</b>   | <b>7.19</b>   | <b>10.26</b>  | <b>10.42</b>  | <b>6.58</b>   | <b>4.76</b>   | <b>9.32</b>   | <b>2.40</b>   |
| Furfural                     | <0.1            | <0.1          | <0.1          | <0.1          | <0.1          | <0.1          | <0.1          | <0.1          | <0.1          | <0.1          | <0.1          | <0.1          | <0.1          |
| Benzaldehyde                 | <0.1            | <0.1          | <0.1          | <0.1          | <0.1          | <0.1          | <0.1          | <0.1          | <0.1          | <0.1          | <0.1          | <0.1          | <0.1          |
| Phenylacetaldehyde           | <0.1            | <0.1          | <0.1          | <0.1          | <0.1          | <0.1          | <0.1          | <0.1          | <0.1          | <0.1          | <0.1          | 0.10          | <0.1          |
| Acetoin                      | <0.1            | <0.1          | <0.1          | <0.1          | <0.1          | <0.1          | <0.1          | <0.1          | <0.1          | <0.1          | <0.1          | <0.1          | <0.1          |
| $\gamma$ -Butyrolactone      | <0.1            | 0.16          | 0.15          | 0.16          | 0.37          | 0.10          | 0.21          | 0.23          | 0.23          | 0.52          | 0.28          | 0.42          | 0.26          |

Table S1 (Continued)

| Compounds               | Strains(Cellar) |         |         |         |         |         |         |         |         |         |         |         |         |
|-------------------------|-----------------|---------|---------|---------|---------|---------|---------|---------|---------|---------|---------|---------|---------|
|                         | G146(A)         | G147(E) | G198(E) | G227(E) | G354(E) | G361(E) | G379(D) | G393(E) | G406(D) | G448(D) | G449(E) | G450(E) | G451(E) |
| 1-Propanol              | 0.13            | 0.36    | 0.51    | 0.25    | 0.32    | 0.32    | 0.23    | 0.72    | 0.32    | 0.32    | 0.28    | 0.28    | 0.89    |
| 1-Butanol               | <0.1            | <0.1    | <0.1    | <0.1    | <0.1    | <0.1    | <0.1    | <0.1    | <0.1    | <0.1    | <0.1    | <0.1    | <0.1    |
| Isobutanol              | 0.48            | 1.15    | 1.13    | 0.59    | 0.62    | 0.90    | 1.17    | 0.59    | 0.90    | 1.07    | 0.61    | 0.88    | 0.96    |
| Isoamyl alcohol         | 5.02            | 9.39    | 9.30    | 6.08    | 7.27    | 4.97    | 7.27    | 4.34    | 6.85    | 7.00    | 6.24    | 7.18    | 6.03    |
| (Z)-3-Hexen-1-ol        | 0.20            | 0.29    | 0.32    | 0.23    | 0.33    | 0.22    | 0.25    | 0.26    | 0.30    | 0.31    | 0.25    | 0.29    | 0.24    |
| 1-Hexanol               | <0.1            | <0.1    | <0.1    | <0.1    | 0.10    | <0.1    | <0.1    | <0.1    | <0.1    | <0.1    | <0.1    | <0.1    | <0.1    |
| Metionol                | 0.65            | 3.01    | 3.02    | 1.02    | 1.60    | 3.57    | 1.81    | 0.73    | 3.74    | 2.47    | 2.58    | 2.16    | 0.17    |
| Benzyl alcohol          | <0.1            | <0.1    | <0.1    | <0.1    | <0.1    | <0.1    | <0.1    | <0.1    | <0.1    | <0.1    | <0.1    | <0.1    | <0.1    |
| β-Phenylethyl alcohol   | 2.66            | 7.04    | 6.84    | 3.38    | 4.18    | 5.09    | 5.78    | 3.97    | 5.02    | 3.92    | 5.39    | 6.30    | 4.56    |
| Ethyl butyrate          | 11.23           | 29.60   | 20.85   | 13.17   | 21.66   | 20.01   | 11.63   | 11.08   | 11.78   | 16.42   | 14.78   | 22.62   | 9.79    |
| Ethyl isovalerate       | 97.85           | 206.89  | 223.90  | 109.24  | 233.71  | 353.57  | 175.45  | 204.28  | 190.60  | 209.63  | 143.98  | 165.87  | 161.16  |
| Isoamyl acetate         | 69.10           | 255.54  | 200.81  | 116.10  | 110.05  | 139.25  | 110.46  | 28.56   | 177.37  | 123.29  | 166.50  | 141.55  | 293.01  |
| Ethyl hexanoate         | 32.71           | 109.48  | 93.01   | 68.99   | 95.13   | 70.03   | 35.27   | 29.56   | 42.36   | 42.35   | 55.03   | 86.46   | 23.03   |
| Ethyl-3-hydroxybutyrate | <0.1            | <0.1    | <0.1    | <0.1    | <0.1    | <0.1    | <0.1    | <0.1    | <0.1    | <0.1    | <0.1    | <0.1    | <0.1    |
| Hexyl acetate           | <0.1            | 0.13    | 0.13    | 0.10    | 0.10    | 0.10    | <0.1    | <0.1    | 0.12    | 0.10    | 0.10    | 0.11    | <0.1    |
| 2-Phenylethyl acetate   | 4.25            | 10.54   | 7.85    | 3.89    | 3.12    | 5.08    | 8.22    | 2.67    | 9.99    | 5.17    | 6.88    | 9.84    | 13.04   |
| Diethyl succinate       | <0.1            | <0.1    | <0.1    | <0.1    | <0.1    | <0.1    | <0.1    | <0.1    | <0.1    | <0.1    | <0.1    | <0.1    | <0.1    |
| Ethyl octanoate         | 0.82            | 2.92    | 2.70    | 1.67    | 1.49    | 2.56    | 0.83    | 0.31    | 1.46    | 1.59    | 1.81    | 2.89    | 0.23    |
| Ethyl lactate           | 0.12            | <0.1    | <0.1    | <0.1    | <0.1    | <0.1    | 0.13    | 0.30    | 0.11    | 0.12    | <0.1    | <0.1    | <0.1    |
| Isobutyric acid         | 40.44           | 113.22  | 128.15  | 58.97   | 81.81   | 86.47   | 183.35  | 46.65   | 85.93   | 157.87  | 51.37   | 56.84   | 74.88   |
| Butyric acid            | 0.89            | 1.47    | 1.37    | 1.10    | 1.58    | 1.32    | 0.98    | 0.92    | 1.07    | 1.10    | 1.08    | 1.39    | 0.94    |
| Isovaleric acid         | 15.63           | 81.86   | 98.10   | 43.50   | 76.91   | 50.73   | 63.48   | 31.09   | 48.05   | 55.51   | 46.56   | 49.46   | 45.83   |
| Hexanoic acid           | 6.18            | 16.59   | 12.93   | 9.63    | 16.18   | 11.05   | 7.14    | 5.20    | 7.91    | 7.94    | 10.32   | 15.44   | 4.23    |
| Octanoic acid           | 12.29           | 22.53   | 17.67   | 13.55   | 23.32   | 16.47   | 13.78   | 2.22    | 12.25   | 11.76   | 14.61   | 21.06   | 1.70    |
| Decanoic acid           | 1.51            | 1.69    | 1.40    | 1.29    | 2.01    | 1.37    | 1.66    | <0.1    | 1.19    | 1.26    | 1.01    | 1.57    | 0.27    |
| Diacetyl                | 8.86            | 4.84    | 4.16    | 3.87    | 3.55    | 2.75    | 7.41    | 5.99    | 8.28    | 5.35    | 3.57    | 5.45    | 5.59    |
| Furfural                | <0.1            | <0.1    | <0.1    | <0.1    | <0.1    | <0.1    | <0.1    | <0.1    | <0.1    | <0.1    | <0.1    | <0.1    | <0.1    |
| Benzaldehyde            | <0.1            | <0.1    | <0.1    | <0.1    | <0.1    | <0.1    | <0.1    | <0.1    | <0.1    | <0.1    | <0.1    | <0.1    | <0.1    |
| Phenylacetaldehyde      | <0.1            | <0.1    | <0.1    | <0.1    | <0.1    | <0.1    | <0.1    | <0.1    | <0.1    | <0.1    | <0.1    | <0.1    | 0.17    |
| Acetoin                 | <0.1            | <0.1    | <0.1    | <0.1    | <0.1    | <0.1    | <0.1    | <0.1    | <0.1    | <0.1    | <0.1    | <0.1    | <0.1    |
| γ-Butyrolactone         | 0.29            | 0.20    | 0.31    | 0.18    | 0.24    | <0.1    | 0.28    | 0.20    | 0.26    | 0.22    | <0.1    | 0.18    | 0.34    |
|                         | G452(E)         | G453(E) | G454(E) | G456(E) | G457(E) | G458(E) | G460(E) | G461(E) | G462(E) | G463(E) | G464(E) | G465(E) | G467(E) |
| 1-Propanol              | 0.37            | 0.30    | 0.30    | 0.36    | 0.87    | 0.42    | 0.48    | 0.36    | 0.28    | 0.40    | 1.00    | 0.73    | 0.30    |
| 1-Butanol               | <0.1            | <0.1    | <0.1    | <0.1    | <0.1    | <0.1    | <0.1    | <0.1    | <0.1    | <0.1    | <0.1    | <0.1    | <0.1    |
| Isobutanol              | 1.12            | 1.53    | 0.47    | 1.67    | 1.25    | 1.01    | 1.11    | 1.38    | 1.32    | 1.19    | 1.44    | 0.90    | 1.20    |
| Isoamyl alcohol         | 9.33            | 10.16   | 4.35    | 14.68   | 5.15    | 9.55    | 10.14   | 14.09   | 13.45   | 9.80    | 5.32    | 6.49    | 8.98    |
| (Z)-3-Hexen-1-ol        | 0.29            | 0.34    | 0.33    | 0.39    | 0.27    | 0.37    | 0.33    | 0.37    | 0.18    | 0.36    | 0.26    | 0.27    | 0.34    |
| 1-Hexanol               | <0.1            | <0.1    | 0.10    | <0.1    | <0.1    | 0.10    | <0.1    | 0.10    | <0.1    | <0.1    | <0.1    | <0.1    | <0.1    |
| Metionol                | 2.59            | 3.17    | 1.40    | 6.01    | 0.71    | 3.85    | 4.37    | 2.90    | 2.01    | 3.51    | 0.82    | 1.62    | 3.71    |
| Benzyl alcohol          | <0.1            | <0.1    | <0.1    | <0.1    | <0.1    | <0.1    | <0.1    | <0.1    | <0.1    | <0.1    | <0.1    | <0.1    | <0.1    |
| β-Phenylethyl alcohol   | 6.23            | 6.98    | 3.16    | 11.04   | 5.49    | 7.80    | 9.46    | 9.22    | 8.23    | 7.99    | 5.19    | 6.48    | 8.14    |
| Ethyl butyrate          | 16.08           | 18.83   | 13.90   | 26.96   | 12.24   | 44.00   | 22.82   | 30.33   | 12.32   | 26.63   | 10.63   | 10.57   | 19.32   |
| Ethyl isovalerate       | 154.38          | 187.13  | 141.01  | 209.55  | 169.77  | 176.82  | 261.27  | 164.39  | 54.07   | 217.22  | 153.03  | 137.01  | 217.56  |
| Isoamyl acetate         | 155.69          | 184.37  | 73.02   | 311.58  | 286.71  | 139.92  | 157.92  | 208.65  | 51.13   | 271.54  | 198.87  | 26.53   | 217.66  |
| Ethyl hexanoate         | 61.91           | 68.84   | 50.70   | 81.84   | 33.12   | 73.78   | 55.69   | 72.86   | 28.07   | 87.53   | 28.39   | 33.81   | 59.95   |
| Ethyl-3-hydroxybutyrate | <0.1            | <0.1    | <0.1    | <0.1    | <0.1    | <0.1    | <0.1    | <0.1    | <0.1    | <0.1    | <0.1    | <0.1    | <0.1    |
| Hexyl acetate           | <0.1            | 0.10    | 0.14    | 0.13    | <0.1    | 0.10    | 0.11    | 0.11    | <0.1    | 0.14    | <0.1    | <0.1    | 0.12    |
| 2-Phenylethyl acetate   | 7.04            | 9.41    | 4.04    | 14.96   | 13.04   | 7.83    | 7.78    | 8.90    | 3.00    | 11.94   | 9.51    | 3.32    | 11.83   |
| Diethyl succinate       | <0.1            | <0.1    | <0.1    | <0.1    | <0.1    | <0.1    | <0.1    | <0.1    | <0.1    | <0.1    | <0.1    | <0.1    | <0.1    |
| Ethyl octanoate         | 2.33            | 1.60    | 0.97    | 2.37    | 0.34    | 2.48    | 2.32    | 2.01    | 0.36    | 2.41    | 0.31    | 0.31    | 2.13    |
| Ethyl lactate           | <0.1            | 0.10    | 0.10    | 0.10    | <0.1    | 0.10    | <0.1    | 0.10    | <0.1    | 0.10    | <0.1    | 0.30    | <0.1    |
| Isobutyric acid         | 119.35          | 123.29  | 66.74   | 147.32  | 96.52   | 150.85  | 124.91  | 139.67  | 96.85   | 125.27  | 181.33  | 49.19   | 147.29  |
| Butyric acid            | 1.08            | 1.38    | 1.11    | 1.34    | 1.00    | 1.96    | 1.45    | 1.48    | 1.05    | 1.56    | 0.92    | 0.91    | 1.34    |
| Isovaleric acid         | 82.28           | 60.48   | 41.62   | 108.67  | 39.75   | 94.47   | 83.11   | 105.85  | 78.33   | 83.22   | 52.60   | 35.71   | 78.20   |
| Hexanoic acid           | 9.42            | 12.20   | 9.46    | 15.54   | 6.23    | 15.28   | 13.12   | 12.90   | 4.41    | 14.59   | 5.32    | 5.03    | 11.59   |
| Octanoic acid           | 14.32           | 19.99   | 14.53   | 24.90   | 2.31    | 23.75   | 18.45   | 20.58   | 8.35    | 21.28   | 2.22    | 2.03    | 16.42   |
| Decanoic acid           | 1.28            | 1.49    | 1.39    | 1.87    | 0.26    | 1.78    | 1.59    | 1.74    | 0.80    | 1.80    | 0.42    | 1.65    | 1.44    |
| Diacetyl                | 5.91            | 6.13    | 4.42    | 10.55   | 5.61    | 5.55    | 4.15    | 8.62    | 3.76    | 5.35    | 5.11    | 5.74    | 4.42    |
| Furfural                | <0.1            | <0.1    | <0.1    | <0.1    | <0.1    | <0.1    | <0.1    | <0.1    | <0.1    | <0.1    | <0.1    | <0.1    | <0.1    |
| Benzaldehyde            | <0.1            | <0.1    | <0.1    | <0.1    | <0.1    | <0.1    | <0.1    | <0.1    | <0.1    | <0.1    | <0.1    | <0.1    | <0.1    |
| Phenylacetaldehyde      | <0.1            | <0.1    | <0.1    | <0.1    | 0.38    | <0.1    | <0.1    | <0.1    | <0.1    | <0.1    | 0.26    | <0.1    | <0.1    |
| Acetoin                 | <0.1            | <0.1    | <0.1    | <0.1    | <0.1    | <0.1    | <0.1    | <0.1    | <0.1    | <0.1    | <0.1    | <0.1    | <0.1    |
| γ-Butyrolactone         | 0.26            | 0.15    | 0.24    | 0.24    | 0.34    | 0.32    | 0.21    | 0.27    | 0.17    | 0.12    | 0.45    | 0.32    | 0.12    |

Table S1 (Continued)

| Compounds               | Strains(Cellar) |         |         |         |         |         |         |         |         |         |         |         |         |
|-------------------------|-----------------|---------|---------|---------|---------|---------|---------|---------|---------|---------|---------|---------|---------|
|                         | G468(E)         | G469(E) | G470(E) | G471(E) | G472(E) | G473(E) | G474(E) | G475(E) | G476(E) | G487(E) | G488(E) | G489(E) | G490(E) |
| 1-Propanol              | 0.34            | 0.31    | 0.28    | 0.33    | 0.33    | 0.30    | 0.31    | 0.26    | 0.31    | 0.27    | 0.30    | 0.31    | 0.48    |
| 1-Butanol               | <0.1            | <0.1    | <0.1    | <0.1    | <0.1    | <0.1    | <0.1    | <0.1    | <0.1    | <0.1    | <0.1    | <0.1    | <0.1    |
| Isobutanol              | 0.91            | 0.93    | 0.78    | 1.14    | 0.81    | 0.77    | 0.86    | 0.77    | 0.93    | 0.80    | 0.97    | 0.78    | 0.76    |
| Isoamyl alcohol         | 6.46            | 8.88    | 5.55    | 6.37    | 9.68    | 6.76    | 8.55    | 6.96    | 6.41    | 8.91    | 12.22   | 6.84    | 7.44    |
| (Z)-3-Hexen-1-ol        | 0.27            | 0.41    | 0.34    | 0.35    | 0.39    | 0.38    | 0.38    | 0.30    | 0.33    | 0.29    | 0.26    | 0.16    | 0.18    |
| 1-Hexanol               | <0.1            | 0.13    | 0.12    | 0.12    | 0.16    | 0.13    | 0.11    | <0.1    | <0.1    | <0.1    | <0.1    | <0.1    | <0.1    |
| Metionol                | 0.73            | 2.49    | 1.11    | 2.03    | 1.77    | 1.42    | 2.70    | 1.37    | 0.78    | 2.36    | 1.09    | 1.43    | 1.38    |
| Benzyl alcohol          | <0.1            | <0.1    | <0.1    | <0.1    | <0.1    | <0.1    | <0.1    | <0.1    | <0.1    | <0.1    | <0.1    | <0.1    | <0.1    |
| β-Phenylethyl alcohol   | 8.54            | 7.88    | 6.93    | 7.02    | 6.78    | 6.67    | 5.88    | 9.10    | 5.15    | 5.25    | 4.82    | 5.93    | 3.53    |
| Ethyl butyrate          | 25.91           | 19.91   | 23.56   | 28.68   | 29.81   | 30.69   | 19.69   | 9.14    | 18.70   | 26.60   | 17.26   | 18.58   | 11.84   |
| Ethyl isovalerate       | 186.42          | 152.22  | 83.34   | 100.07  | 103.02  | 97.05   | 203.59  | 56.48   | 185.56  | 115.81  | 145.47  | 171.12  | 145.68  |
| Isoamyl acetate         | 281.85          | 207.98  | 242.27  | 295.89  | 274.41  | 245.82  | 200.06  | 48.91   | 150.29  | 230.31  | 168.80  | 192.81  | 296.80  |
| Ethyl hexanoate         | 75.40           | 54.95   | 59.96   | 105.92  | 86.06   | 79.83   | 76.77   | 23.15   | 76.15   | 73.41   | 65.91   | 77.06   | 29.59   |
| Ethyl-3-hydroxybutyrate | <0.1            | <0.1    | <0.1    | <0.1    | <0.1    | <0.1    | <0.1    | <0.1    | <0.1    | <0.1    | <0.1    | <0.1    | <0.1    |
| Hexyl acetate           | 0.12            | 0.14    | 0.15    | 0.19    | 0.17    | 0.14    | 0.22    | <0.1    | 0.21    | 0.20    | 0.18    | 0.21    | <0.1    |
| 2-Phenylethyl acetate   | 9.28            | 10.31   | 11.21   | 10.15   | 12.01   | 9.56    | 10.64   | 3.85    | 9.41    | 12.11   | 9.70    | 11.74   | 14.26   |
| Diethyl succinate       | <0.1            | <0.1    | <0.1    | <0.1    | <0.1    | <0.1    | <0.1    | <0.1    | <0.1    | <0.1    | <0.1    | <0.1    | <0.1    |
| Ethyl octanoate         | 2.15            | 1.36    | 1.50    | 2.77    | 2.85    | 2.42    | 2.27    | 0.30    | 1.38    | 1.97    | 1.61    | 2.21    | 0.29    |
| Ethyl lactate           | 0.10            | <0.1    | <0.1    | 0.12    | <0.1    | <0.1    | 0.12    | <0.1    | 0.12    | 0.11    | 0.14    | 0.12    | <0.1    |
| Isobutyric acid         | 211.13          | 131.91  | 89.17   | 107.56  | 96.06   | 90.55   | 113.44  | 110.76  | 82.36   | 42.36   | 63.69   | 104.66  | 60.79   |
| Butyric acid            | 1.36            | 1.16    | 0.99    | 1.17    | 1.13    | 1.15    | 1.41    | 0.94    | 1.22    | 1.34    | 1.24    | 1.39    | 0.97    |
| Isovaleric acid         | 97.24           | 80.05   | 70.43   | 106.56  | 75.67   | 70.81   | 71.27   | 69.65   | 55.25   | 45.94   | 48.08   | 69.23   | 35.97   |
| Hexanoic acid           | 12.95           | 9.65    | 8.29    | 12.02   | 11.47   | 12.03   | 15.00   | 3.78    | 10.25   | 13.03   | 12.49   | 15.37   | 6.07    |
| Octanoic acid           | 19.21           | 17.96   | 18.44   | 24.18   | 20.98   | 20.01   | 19.83   | 7.43    | 15.03   | 17.80   | 17.57   | 19.64   | 2.58    |
| Decanoic acid           | 1.63            | 2.05    | 2.10    | 2.25    | 2.05    | 1.89    | 1.59    | 0.77    | 1.07    | 1.37    | 1.18    | 1.61    | 0.25    |
| Diacetyl                | 5.41            | 6.90    | 12.20   | 14.14   | 12.16   | 10.37   | 5.87    | 3.49    | 9.88    | 8.04    | 7.34    | 5.75    | 6.16    |
| Furfural                | <0.1            | <0.1    | <0.1    | <0.1    | <0.1    | <0.1    | <0.1    | <0.1    | <0.1    | <0.1    | <0.1    | <0.1    | <0.1    |
| Benzaldehyde            | <0.1            | <0.1    | <0.1    | <0.1    | <0.1    | <0.1    | <0.1    | <0.1    | <0.1    | <0.1    | <0.1    | <0.1    | <0.1    |
| Phenylacetaldehyde      | <0.1            | <0.1    | <0.1    | <0.1    | <0.1    | <0.1    | <0.1    | <0.1    | <0.1    | <0.1    | <0.1    | <0.1    | 0.16    |
| Acetoin                 | <0.1            | <0.1    | <0.1    | <0.1    | <0.1    | <0.1    | <0.1    | <0.1    | <0.1    | <0.1    | <0.1    | <0.1    | <0.1    |
| γ-Butyrolactone         | 0.24            | 0.31    | 0.23    | 0.35    | 0.26    | 0.19    | 0.21    | 0.14    | 0.15    | 0.20    | 0.13    | 0.26    | 0.41    |
|                         | G491(E)         | G492(E) | G493(E) | G494(E) | G495(E) | G496(E) | G497(E) | G499(E) | G500(E) | G501(E) | G502(E) | G503(F) | G504(F) |
| 1-Propanol              | 0.86            | 0.28    | 0.23    | 0.26    | 0.28    | 0.29    | 0.25    | 0.32    | 0.29    | 0.32    | 0.56    | 0.23    | 0.19    |
| 1-Butanol               | <0.1            | <0.1    | <0.1    | <0.1    | <0.1    | <0.1    | <0.1    | <0.1    | <0.1    | <0.1    | <0.1    | <0.1    | <0.1    |
| Isobutanol              | 0.91            | 0.93    | 0.78    | 1.14    | 0.81    | 0.77    | 0.86    | 0.77    | 0.93    | 0.80    | 0.97    | 0.78    | 0.76    |
| Isoamyl alcohol         | 6.46            | 8.88    | 5.55    | 6.37    | 9.68    | 6.76    | 8.55    | 6.96    | 6.41    | 8.91    | 12.22   | 6.84    | 7.44    |
| (Z)-3-Hexen-1-ol        | 0.27            | 0.41    | 0.34    | 0.35    | 0.39    | 0.38    | 0.38    | 0.30    | 0.33    | 0.29    | 0.26    | 0.16    | 0.18    |
| 1-Hexanol               | <0.1            | 0.13    | 0.12    | 0.12    | 0.16    | 0.13    | 0.11    | <0.1    | <0.1    | <0.1    | <0.1    | <0.1    | <0.1    |
| Metionol                | 0.73            | 2.49    | 1.11    | 2.03    | 1.77    | 1.42    | 2.70    | 1.37    | 0.78    | 2.36    | 1.09    | 1.43    | 1.38    |
| Benzyl alcohol          | <0.1            | <0.1    | <0.1    | <0.1    | <0.1    | <0.1    | <0.1    | <0.1    | <0.1    | <0.1    | <0.1    | <0.1    | <0.1    |
| β-Phenylethyl alcohol   | 6.17            | 5.51    | 3.69    | 3.88    | 5.69    | 4.32    | 5.11    | 5.39    | 3.67    | 4.80    | 3.43    | 4.45    | 4.40    |
| Ethyl butyrate          | 13.14           | 14.36   | 10.72   | 11.90   | 14.41   | 14.31   | 13.74   | 13.56   | 15.81   | 14.07   | 17.43   | 12.96   | 13.15   |
| Ethyl isovalerate       | 156.35          | 154.17  | 142.57  | 129.85  | 89.94   | 120.78  | 129.32  | 104.33  | 111.09  | 87.46   | 33.15   | 63.92   | 59.52   |
| Isoamyl acetate         | 296.44          | 143.08  | 72.29   | 87.65   | 89.81   | 112.11  | 142.25  | 139.21  | 97.36   | 138.68  | 153.22  | 139.09  | 141.90  |
| Ethyl hexanoate         | 35.87           | 84.94   | 36.55   | 28.29   | 43.63   | 43.72   | 51.44   | 46.37   | 58.00   | 45.59   | 30.97   | 33.62   | 34.71   |
| Ethyl-3-hydroxybutyrate | <0.1            | <0.1    | <0.1    | <0.1    | <0.1    | <0.1    | <0.1    | <0.1    | <0.1    | <0.1    | <0.1    | <0.1    | <0.1    |
| Hexyl acetate           | <0.1            | 0.23    | 0.13    | 0.11    | 0.13    | 0.15    | 0.14    | 0.11    | 0.12    | 0.10    | 0.12    | <0.1    | <0.1    |
| 2-Phenylethyl acetate   | 12.38           | 7.74    | 5.28    | 5.37    | 6.58    | 7.69    | 7.93    | 10.71   | 7.29    | 6.40    | 5.61    | 6.96    | 6.83    |
| Diethyl succinate       | <0.1            | <0.1    | <0.1    | <0.1    | <0.1    | <0.1    | <0.1    | <0.1    | <0.1    | <0.1    | <0.1    | <0.1    | <0.1    |
| Ethyl octanoate         | 0.37            | 1.92    | 0.79    | 0.46    | 1.23    | 0.94    | 1.22    | 1.38    | 1.23    | 1.05    | 1.26    | 1.70    | 1.76    |
| Ethyl lactate           | <0.1            | 0.11    | 0.12    | 0.13    | 0.15    | 0.16    | 0.15    | 0.14    | 0.11    | 0.12    | 0.15    | <0.1    | <0.1    |
| Isobutyric acid         | 62.58           | 79.35   | 63.19   | 95.80   | 84.00   | 72.65   | 90.61   | 82.10   | 120.75  | 69.23   | 98.12   | 28.24   | 23.28   |
| Butyric acid            | 1.03            | 1.20    | 0.99    | 0.91    | 0.84    | 0.90    | 0.93    | 0.99    | 1.10    | 0.95    | 1.05    | 0.71    | 0.74    |
| Isovaleric acid         | 40.64           | 59.29   | 37.16   | 47.77   | 50.42   | 43.86   | 59.00   | 50.82   | 47.33   | 50.64   | 59.30   | 25.53   | 24.67   |
| Hexanoic acid           | 6.52            | 15.55   | 7.03    | 5.07    | 7.10    | 7.12    | 7.86    | 9.05    | 10.60   | 7.72    | 7.10    | 6.22    | 6.05    |
| Octanoic acid           | 2.51            | 22.27   | 10.35   | 10.52   | 12.66   | 12.30   | 13.36   | 13.16   | 14.92   | 12.68   | 11.83   | 7.96    | 7.58    |
| Decanoic acid           | 0.45            | 1.81    | 0.79    | 0.79    | 1.19    | 1.02    | 1.17    | 0.99    | 1.20    | 0.96    | 0.96    | 0.51    | 0.31    |
| Diacetyl                | 5.32            | 7.66    | 6.68    | 7.83    | 10.47   | 9.11    | 8.30    | 8.29    | 8.80    | 7.82    | 15.11   | 4.50    | 4.64    |
| Furfural                | <0.1            | <0.1    | <0.1    | <0.1    | <0.1    | <0.1    | <0.1    | <0.1    | <0.1    | <0.1    | <0.1    | <0.1    | <0.1    |
| Benzaldehyde            | <0.1            | <0.1    | <0.1    | <0.1    | <0.1    | <0.1    | <0.1    | <0.1    | <0.1    | <0.1    | <0.1    | <0.1    | <0.1    |
| Phenylacetaldehyde      | 0.23            | <0.1    | <0.1    | <0.1    | <0.1    | <0.1    | <0.1    | <0.1    | <0.1    | <0.1    | <0.1    | <0.1    | <0.1    |
| Acetoin                 | <0.1            | <0.1    | <0.1    | <0.1    | <0.1    | <0.1    | <0.1    | <0.1    | <0.1    | <0.1    | <0.1    | <0.1    | <0.1    |
| γ-Butyrolactone         | 0.30            | 0.35    | 0.13    | 0.14    | 0.38    | 0.18    | 0.50    | 0.18    | 0.22    | 0.38    | 0.39    | <0.1    | <0.1    |

Table S1 (Continued)

| Compounds               | Strains(Cellar) |               |               |               |               |               |               |               |               |               |               |               |               |
|-------------------------|-----------------|---------------|---------------|---------------|---------------|---------------|---------------|---------------|---------------|---------------|---------------|---------------|---------------|
|                         | G505(F)         | G506(F)       | G507(F)       | G508(F)       | G509(F)       | G510(F)       | G511(F)       | G512(F)       | G513(F)       | G514(F)       | G515(F)       | G516(F)       | G517(F)       |
| 1-Propanol              | 0.69            | 0.17          | 0.13          | 0.18          | 0.23          | 0.22          | 0.23          | 0.28          | 0.35          | 0.29          | 0.36          | 0.32          | 0.28          |
| 1-Butanol               | <0.1            | <0.1          | <0.1          | <0.1          | <0.1          | <0.1          | <0.1          | <0.1          | <0.1          | <0.1          | <0.1          | <0.1          | <0.1          |
| Isobutanol              | 0.70            | 0.38          | 0.59          | 0.77          | 0.94          | 0.80          | 0.85          | 1.07          | 0.91          | 0.92          | 0.86          | 0.90          | 0.86          |
| Isoamyl alcohol         | <b>4.55</b>     | <b>4.19</b>   | <b>4.06</b>   | <b>7.14</b>   | <b>8.03</b>   | <b>6.95</b>   | <b>7.95</b>   | <b>10.36</b>  | <b>7.13</b>   | <b>5.91</b>   | <b>5.51</b>   | <b>6.41</b>   | <b>5.72</b>   |
| (Z)-3-Hexen-1-ol        | 0.19            | 0.11          | 0.16          | 0.19          | 0.21          | 0.23          | 0.27          | 0.29          | 0.22          | 0.20          | 0.24          | 0.25          | 0.22          |
| 1-Hexanol               | <0.1            | <0.1          | <0.1          | <0.1          | <0.1          | <0.1          | <0.1          | <0.1          | <0.1          | <0.1          | <0.1          | <0.1          | <0.1          |
| Metionol                | 0.19            | 0.70          | <b>1.80</b>   | <b>1.30</b>   | <b>2.61</b>   | <b>2.37</b>   | <b>2.97</b>   | <b>3.00</b>   | <b>2.00</b>   | <b>1.79</b>   | <b>2.62</b>   | <b>2.61</b>   | <b>2.53</b>   |
| Benzyl alcohol          | <0.1            | <0.1          | <0.1          | <0.1          | <0.1          | <0.1          | <0.1          | <0.1          | <0.1          | <0.1          | <0.1          | <0.1          | <0.1          |
| β-Phenylethyl alcohol   | <b>4.97</b>     | <b>1.88</b>   | <b>1.96</b>   | <b>2.66</b>   | <b>5.91</b>   | <b>6.05</b>   | <b>6.81</b>   | <b>7.36</b>   | <b>9.04</b>   | <b>6.22</b>   | <b>5.08</b>   | <b>5.20</b>   | <b>4.96</b>   |
| Ethyl butyrate          | <b>12.49</b>    | <b>10.53</b>  | <b>28.36</b>  | <b>15.86</b>  | <b>13.30</b>  | <b>13.68</b>  | <b>13.75</b>  | <b>17.55</b>  | <b>12.52</b>  | <b>10.76</b>  | <b>10.62</b>  | <b>12.68</b>  | <b>10.21</b>  |
| Ethyl isovalerate       | <b>134.69</b>   | <b>38.65</b>  | <b>99.03</b>  | <b>45.44</b>  | <b>133.50</b> | <b>130.54</b> | <b>119.44</b> | <b>148.59</b> | <b>132.15</b> | <b>117.37</b> | <b>120.13</b> | <b>155.02</b> | <b>114.50</b> |
| Isoamyl acetate         | <b>20.59</b>    | <b>84.80</b>  | <b>44.62</b>  | <b>93.53</b>  | <b>106.38</b> | <b>91.62</b>  | <b>93.18</b>  | <b>136.82</b> | <b>116.55</b> | <b>96.98</b>  | <b>73.77</b>  | <b>91.08</b>  | <b>107.94</b> |
| Ethyl hexanoate         | <b>33.80</b>    | <b>18.94</b>  | <b>22.53</b>  | <b>26.18</b>  | <b>32.81</b>  | <b>39.25</b>  | <b>34.43</b>  | <b>43.83</b>  | <b>45.00</b>  | <b>40.82</b>  | <b>32.29</b>  | <b>34.16</b>  | <b>30.36</b>  |
| Ethyl-3-hydroxybutyrate | <0.1            | <0.1          | <0.1          | <0.1          | <0.1          | <0.1          | <0.1          | <0.1          | <0.1          | <0.1          | <0.1          | <0.1          | <0.1          |
| Hexyl acetate           | <0.1            | <0.1          | <0.1          | <0.1          | <0.1          | <0.1          | <0.1          | <0.1          | <0.1          | <0.1          | <0.1          | <0.1          | <0.1          |
| 2-Phenylethyl acetate   | <b>2.41</b>     | <b>2.46</b>   | 0.91          | <b>2.84</b>   | <b>7.91</b>   | <b>8.15</b>   | <b>8.28</b>   | <b>9.79</b>   | <b>13.26</b>  | <b>10.47</b>  | <b>7.69</b>   | <b>6.74</b>   | <b>10.83</b>  |
| Diethyl succinate       | <0.1            | <0.1          | <0.1          | <0.1          | <0.1          | <0.1          | <0.1          | <0.1          | <0.1          | <0.1          | <0.1          | <0.1          | <0.1          |
| Ethyl octanoate         | 0.28            | 0.81          | <b>1.34</b>   | <b>0.97</b>   | <b>1.20</b>   | <b>1.60</b>   | <b>1.25</b>   | <b>1.76</b>   | <b>1.62</b>   | <b>1.59</b>   | <b>0.88</b>   | <b>1.33</b>   | <b>0.91</b>   |
| Ethyl lactate           | <0.1            | <0.1          | <0.1          | <0.1          | <0.1          | <0.1          | <0.1          | <0.1          | <0.1          | <0.1          | <0.1          | <0.1          | <0.1          |
| Isobutyric acid         | <b>59.98</b>    | <b>17.28</b>  | <b>96.35</b>  | <b>42.85</b>  | <b>90.16</b>  | <b>86.33</b>  | <b>87.87</b>  | <b>96.87</b>  | <b>87.24</b>  | <b>62.94</b>  | <b>89.34</b>  | <b>104.45</b> | <b>91.14</b>  |
| Butyric acid            | <b>1.02</b>     | 0.66          | <b>1.49</b>   | 0.91          | 0.99          | 0.98          | 0.98          | <b>1.01</b>   | 0.93          | 0.83          | 0.88          | 0.90          | 0.83          |
| Isovaleric acid         | <b>39.44</b>    | <b>15.79</b>  | <b>42.31</b>  | <b>31.90</b>  | <b>50.21</b>  | <b>46.24</b>  | <b>49.61</b>  | <b>59.07</b>  | <b>52.52</b>  | <b>39.60</b>  | <b>38.64</b>  | <b>41.08</b>  | <b>44.83</b>  |
| Hexanoic acid           | <b>6.59</b>     | <b>3.00</b>   | <b>6.07</b>   | <b>4.64</b>   | <b>6.99</b>   | <b>8.45</b>   | <b>8.34</b>   | <b>8.84</b>   | <b>7.39</b>   | <b>6.88</b>   | <b>5.28</b>   | <b>5.53</b>   | <b>5.33</b>   |
| Octanoic acid           | <b>2.11</b>     | <b>4.37</b>   | <b>8.94</b>   | <b>6.07</b>   | <b>11.10</b>  | <b>11.75</b>  | <b>12.45</b>  | <b>13.00</b>  | <b>10.68</b>  | <b>10.61</b>  | <b>9.43</b>   | <b>9.14</b>   | <b>8.97</b>   |
| Decanoic acid           | 0.24            | 0.27          | 0.98          | 0.25          | <b>1.02</b>   | 0.16          | 0.19          | 0.21          | <b>1.02</b>   | 0.99          | <b>1.18</b>   | 0.86          | 0.89          |
| Diacetyl                | <b>4.51</b>     | <b>2.81</b>   | <b>2.06</b>   | <b>3.41</b>   | <b>6.25</b>   | <b>6.62</b>   | <b>7.87</b>   | <b>7.46</b>   | <b>4.10</b>   | <b>4.41</b>   | <b>5.21</b>   | <b>5.30</b>   | <b>4.54</b>   |
| Furfural                | <0.1            | <0.1          | <0.1          | <0.1          | <0.1          | <0.1          | <0.1          | <0.1          | <0.1          | <0.1          | <0.1          | <0.1          | <0.1          |
| Benzaldehyde            | <0.1            | <0.1          | <0.1          | <0.1          | <0.1          | <0.1          | <0.1          | <0.1          | <0.1          | <0.1          | <0.1          | <0.1          | <0.1          |
| Phenylacetaldehyde      | <0.1            | <0.1          | <0.1          | <0.1          | <0.1          | <0.1          | <0.1          | <0.1          | <0.1          | <0.1          | <0.1          | <0.1          | <0.1          |
| Acetoin                 | <0.1            | <0.1          | <0.1          | <0.1          | <0.1          | <0.1          | <0.1          | <0.1          | <0.1          | <0.1          | <0.1          | <0.1          | <0.1          |
| γ-Butyrolactone         | 0.15            | <0.1          | 0.23          | <0.1          | 0.12          | 0.14          | 0.16          | 0.14          | 0.12          | <0.1          | 0.16          | 0.13          | 0.13          |
|                         | G518(F)         | G519(F)       | G520(F)       | G521(F)       | G522(F)       | G523(E)       | G524(E)       | G528(F)       | G529(F)       | G531(F)       | CL1889        |               |               |
| 1-Propanol              | 0.26            | 0.64          | 0.67          | 0.83          | 0.81          | 0.24          | 0.23          | 0.24          | 0.26          | 0.21          | 0.41          |               |               |
| 1-Butanol               | <0.1            | <0.1          | <0.1          | <0.1          | <0.1          | <0.1          | <0.1          | <0.1          | <0.1          | <0.1          | <0.1          |               |               |
| Isobutanol              | 0.80            | 0.56          | 0.71          | 0.75          | 0.56          | 0.52          | 0.71          | 0.74          | 0.73          | 0.79          | 0.66          |               |               |
| Isoamyl alcohol         | <b>5.64</b>     | <b>4.72</b>   | <b>5.60</b>   | <b>5.48</b>   | <b>5.77</b>   | <b>4.48</b>   | <b>5.57</b>   | <b>6.93</b>   | <b>5.26</b>   | <b>7.05</b>   | <b>3.05</b>   |               |               |
| (Z)-3-Hexen-1-ol        | 0.23            | 0.31          | 0.22          | 0.24          | 0.23          | <0.1          | 0.26          | 0.27          | 0.25          | 0.26          | 0.50          |               |               |
| 1-Hexanol               | <0.1            | <0.1          | <0.1          | <0.1          | <0.1          | <0.1          | <0.1          | <0.1          | <0.1          | <0.1          | 0.11          |               |               |
| Metionol                | <b>2.92</b>     | 0.47          | 0.58          | 0.83          | 0.48          | 0.23          | 0.59          | <b>2.24</b>   | <b>1.92</b>   | <b>1.48</b>   | 0.61          |               |               |
| Benzyl alcohol          | <0.1            | <0.1          | <0.1          | <0.1          | <0.1          | <0.1          | <0.1          | <0.1          | <0.1          | <0.1          | <0.1          |               |               |
| β-Phenylethyl alcohol   | <b>5.29</b>     | <b>4.46</b>   | <b>4.83</b>   | <b>5.46</b>   | <b>5.09</b>   | <b>2.30</b>   | <b>2.94</b>   | <b>7.46</b>   | <b>5.25</b>   | <b>3.95</b>   | 0.75          |               |               |
| Ethyl butyrate          | <b>11.40</b>    | <b>14.65</b>  | <b>15.14</b>  | <b>15.07</b>  | <b>16.65</b>  | <b>4.42</b>   | <b>12.28</b>  | <b>16.39</b>  | <b>10.00</b>  | <b>18.00</b>  | <b>15.50</b>  |               |               |
| Ethyl isovalerate       | <b>119.29</b>   | <b>139.30</b> | <b>163.16</b> | <b>144.01</b> | <b>133.07</b> | <b>125.69</b> | <b>122.83</b> | <b>140.73</b> | <b>177.53</b> | <b>146.30</b> | <b>93.33</b>  |               |               |
| Isoamyl acetate         | <b>112.50</b>   | <b>110.03</b> | <b>149.18</b> | <b>143.84</b> | <b>156.75</b> | <b>17.15</b>  | <b>84.30</b>  | <b>181.86</b> | <b>116.02</b> | <b>140.68</b> | <b>33.00</b>  |               |               |
| Ethyl hexanoate         | <b>37.14</b>    | <b>34.26</b>  | <b>45.02</b>  | <b>37.85</b>  | <b>49.46</b>  | <b>16.56</b>  | <b>34.37</b>  | <b>38.20</b>  | <b>28.58</b>  | <b>40.15</b>  | <b>50.00</b>  |               |               |
| Ethyl-3-hydroxybutyrate | <0.1            | <0.1          | <0.1          | <0.1          | <0.1          | <0.1          | <0.1          | <0.1          | <0.1          | <0.1          | <0.1          |               |               |
| Hexyl acetate           | <0.1            | <0.1          | <0.1          | <0.1          | <0.1          | <0.1          | <0.1          | 0.11          | 0.12          | 0.11          | <0.1          |               |               |
| 2-Phenylethyl acetate   | <b>10.71</b>    | <b>10.21</b>  | <b>11.05</b>  | <b>11.54</b>  | <b>11.65</b>  | 0.48          | <b>5.33</b>   | <b>16.92</b>  | <b>10.43</b>  | <b>7.07</b>   | <b>3.04</b>   |               |               |
| Diethyl succinate       | <0.1            | <0.1          | <0.1          | <0.1          | <0.1          | <0.1          | <0.1          | <0.1          | <0.1          | <0.1          | <0.1          |               |               |
| Ethyl octanoate         | <b>1.83</b>     | 0.30          | 0.40          | 0.34          | 0.36          | 0.10          | 0.88          | <b>1.01</b>   | 0.91          | 0.96          | 0.88          |               |               |
| Ethyl lactate           | <0.1            | <0.1          | <0.1          | <0.1          | <0.1          | <0.1          | 0.15          | 0.12          | <0.1          | 0.12          | <0.1          |               |               |
| Isobutyric acid         | <b>80.21</b>    | <b>31.49</b>  | <b>61.79</b>  | <b>46.80</b>  | <b>44.73</b>  | <b>81.23</b>  | <b>100.90</b> | <b>120.79</b> | <b>62.16</b>  | <b>109.66</b> | <b>57.80</b>  |               |               |
| Butyric acid            | 0.85            | 0.97          | <b>1.10</b>   | <b>1.12</b>   | <b>1.13</b>   | 0.85          | <b>1.14</b>   | <b>1.14</b>   | 0.94          | <b>1.08</b>   | <b>1.33</b>   |               |               |
| Isovaleric acid         | <b>41.70</b>    | <b>34.32</b>  | <b>57.09</b>  | <b>42.84</b>  | <b>45.68</b>  | <b>14.79</b>  | <b>37.82</b>  | <b>53.79</b>  | <b>22.44</b>  | <b>37.79</b>  | <b>22.42</b>  |               |               |
| Hexanoic acid           | <b>5.95</b>     | <b>6.37</b>   | <b>7.45</b>   | <b>6.74</b>   | <b>9.44</b>   | <b>2.01</b>   | <b>7.19</b>   | <b>6.14</b>   | <b>5.76</b>   | <b>8.11</b>   | <b>7.40</b>   |               |               |
| Octanoic acid           | <b>8.78</b>     | <b>1.89</b>   | <b>2.35</b>   | <b>2.48</b>   | <b>2.82</b>   | <b>1.57</b>   | <b>10.67</b>  | <b>12.39</b>  | <b>11.60</b>  | <b>15.43</b>  | <b>4.36</b>   |               |               |
| Decanoic acid           | 0.95            | 0.23          | 0.37          | 0.42          | 0.43          | 0.21          | 0.87          | <b>1.45</b>   | <b>1.26</b>   | <b>1.43</b>   | 0.73          |               |               |
| Diacetyl                | <b>4.31</b>     | <b>4.26</b>   | <b>5.37</b>   | <b>4.26</b>   | <b>5.50</b>   | <b>3.55</b>   | <b>6.51</b>   | <b>8.05</b>   | <b>11.21</b>  | <b>9.83</b>   | <b>6.30</b>   |               |               |
| Furfural                | <0.1            | <0.1          | <0.1          | <0.1          | <0.1          | <0.1          | <0.1          | <0.1          | <0.1          | <0.1          | <0.1          |               |               |
| Benzaldehyde            | <0.1            | <0.1          | <0.1          | <0.1          | <0.1          | <0.1          | <0.1          | <0.1          | <0.1          | <0.1          | <0.1          |               |               |
| Phenylacetaldehyde      | <0.1            | <0.1          | 0.12          | 0.29          | 0.27          | <0.1          | <0.1          | <0.1          | <0.1          | <0.1          | 0.52          |               |               |
| Acetoin                 | <0.1            | <0.1          | <0.1          | <0.1          | <0.1          | <0.1          | <0.1          | <0.1          | <0.1          | <0.1          | <0.1          |               |               |
| γ-Butyrolactone         | 0.13            | 0.17          | 0.30          | 0.26          | 0.23          | 0.17          | 0.30          | 0.40          | 0.22          | 0.24          | 0.27          |               |               |
